# Supplementary material for: The structure of plutonium(iv) oxide as hydrolysed clusters in aqueous suspensions
Source: Royal Society of Chemistry journal article supplement (doi:10.1039/c2dt32185h), 2012-11-06

# **The structure of plutonium(IV) oxide as hydrolysed clusters in aqueous suspensions**

Christian Ekberg,<sup>a,\*</sup> Kristian Larsson,<sup>a</sup> Gunnar Skarnemark,<sup>a</sup> Arvid Ödegaard-Jensen<sup>a</sup>  
and Ingmar Persson<sup>b</sup>

<sup>a</sup> Nuclear Chemistry / Industrial materials recycling, Chalmers University of Technology,  
SE-412 96 Göteborg, Sweden,

<sup>b</sup> Department of Chemistry, Swedish University of Agricultural Sciences, P.O.Box 7015,  
SE-750 07 Uppsala, Sweden.

## **Supporting Material**

**Figure S1.** The fit and the individual contribution of the different scattering paths of the EXAFS data of crystalline plutonium(IV) oxide in contact with water. Solid thin line - experimental data, thick line - calculated model function using the parameters given in Table 1. Individual contributions: solid line (offset - -8) - Pu-O single scattering (SS) (offset - -8), Pu--Pu SS (offset - -16), and Pu--O SS (offset - -24).

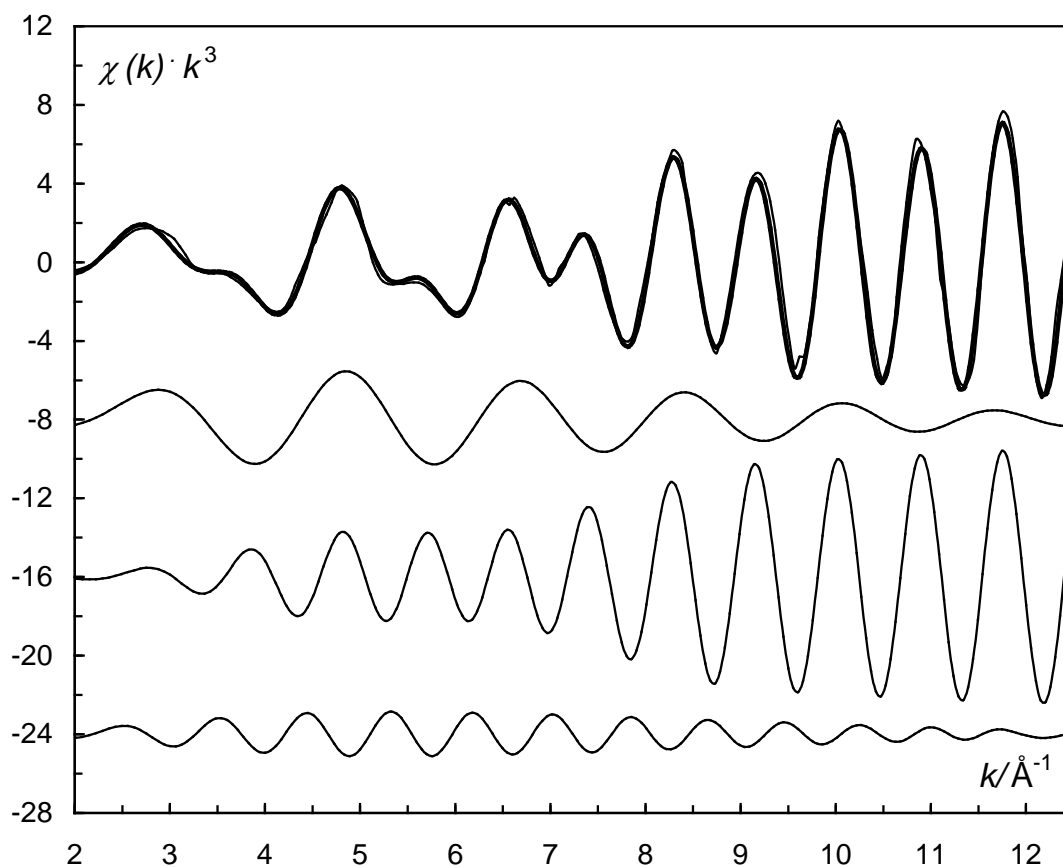

**Figure S2.** The fit and the individual contribution of the different scattering paths of the EXAFS data of colloidal plutonium(IV) oxide, freshly prepared. Solid thin line - experimental data, thick line - calculated model function using the parameters given in Table 1. Individual contributions: solid line (offset -4) - Pu-O single scattering (SS) (offset -8) and Pu--Pu SS (offset -8).

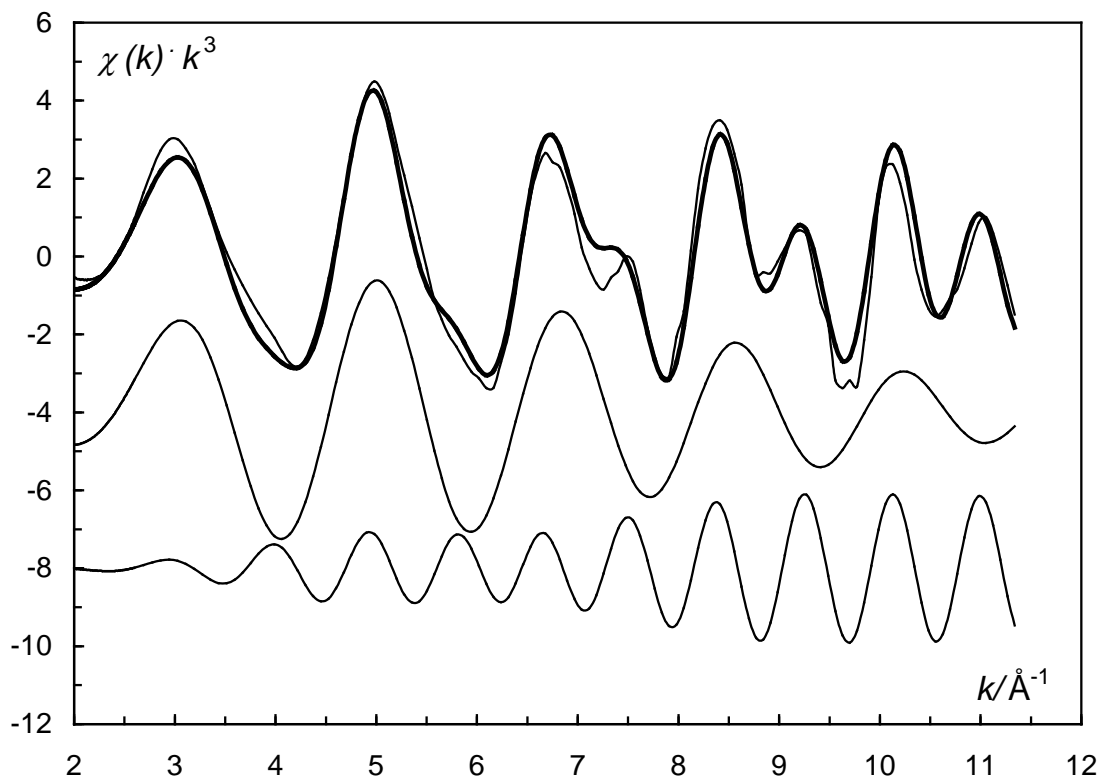

**Figure S3.** The fit and the individual contribution of the different scattering paths of the EXAFS data of colloidal plutonium(IV) oxide, stored for five years. Solid thin line - experimental data, thick line - calculated model function using the parameters given in Table 1. Individual contributions: solid line (offset -3) - Pu-O single scattering (SS) (offset -8) and Pu--Pu SS (offset -7).

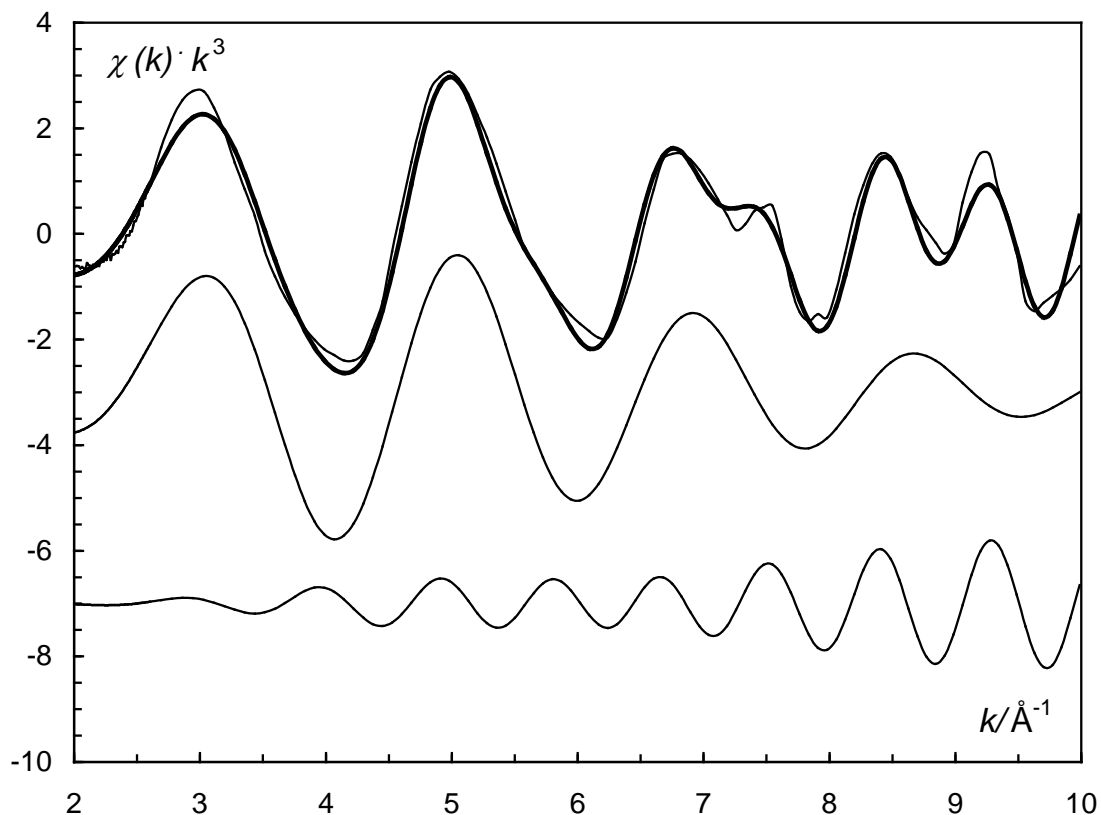

**Figure S4.** X-ray powder diffractogram of the aged  $\text{PuO}_2$  colloid suspension.

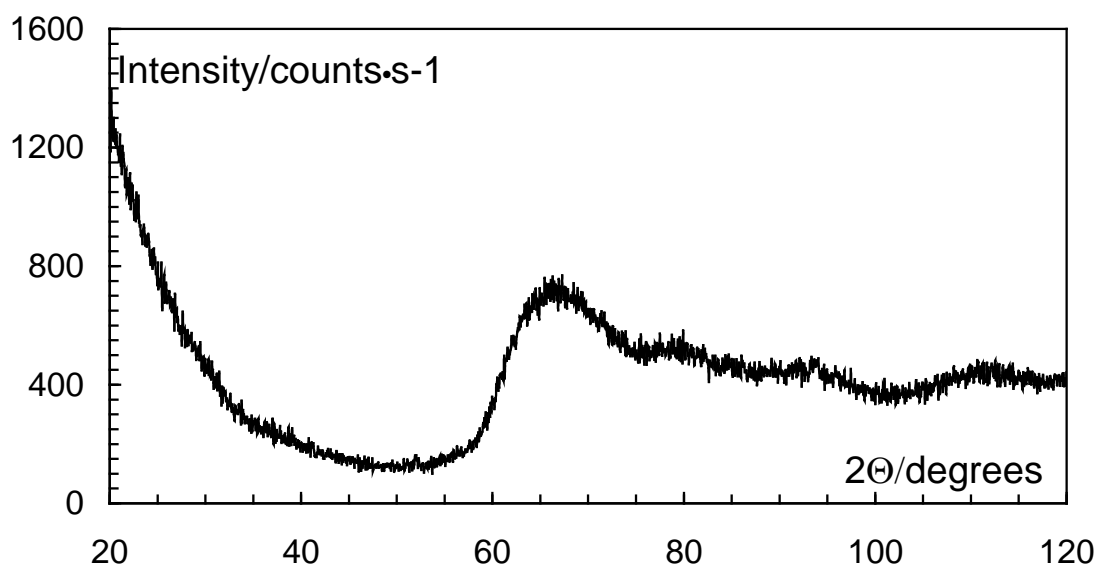

Supplement: c2dt32185h.pdf [file c2dt32185h.pdf]
